# Supplementary material
Source: PubMed Central journal article supplement (PMC3632471)
Supplement: 0eff0382c70e043d3204b265d5c369de_genetics.113.149781-3.pdf [file 0eff0382c70e043d3204b265d5c369de_genetics.113.149781-3.pdf]

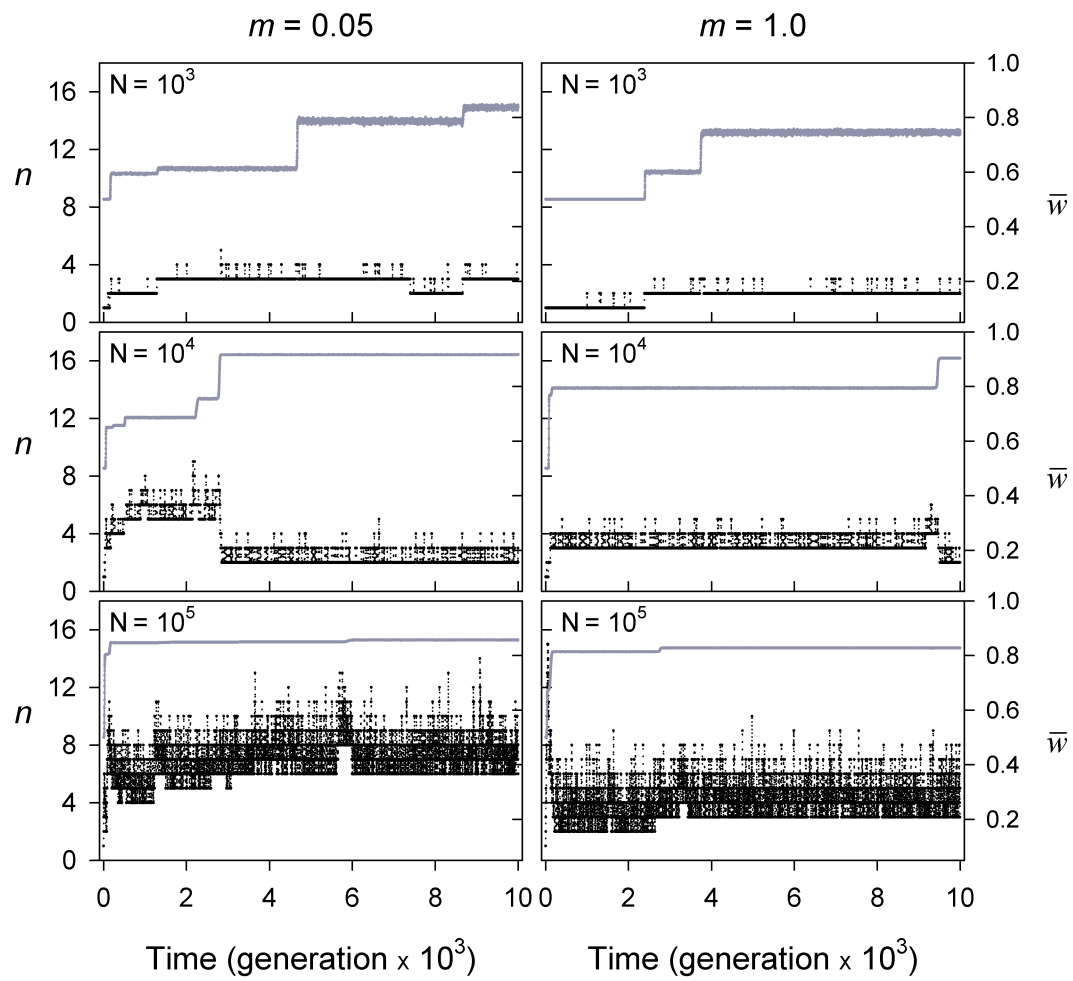

**Figure S1** The number of alleles ( $n$ , left y-axis) and average fitness ( $\bar{w}$ , right y-axis) as a function of time for two levels of gene flow ( $m$ ) and three different population sizes ( $N$ ) for individual simulations. The black, interrupted line indicates  $n$  and the grey continue line indicates  $\bar{w}$ .
