# Supplementary material
Source: PubMed Central journal article supplement (PMC3632471)
Supplement: 540efb0dc6bbe2dcdf38f09bc07c4c44_genetics.113.149781-2.pdf [file 540efb0dc6bbe2dcdf38f09bc07c4c44_genetics.113.149781-2.pdf]

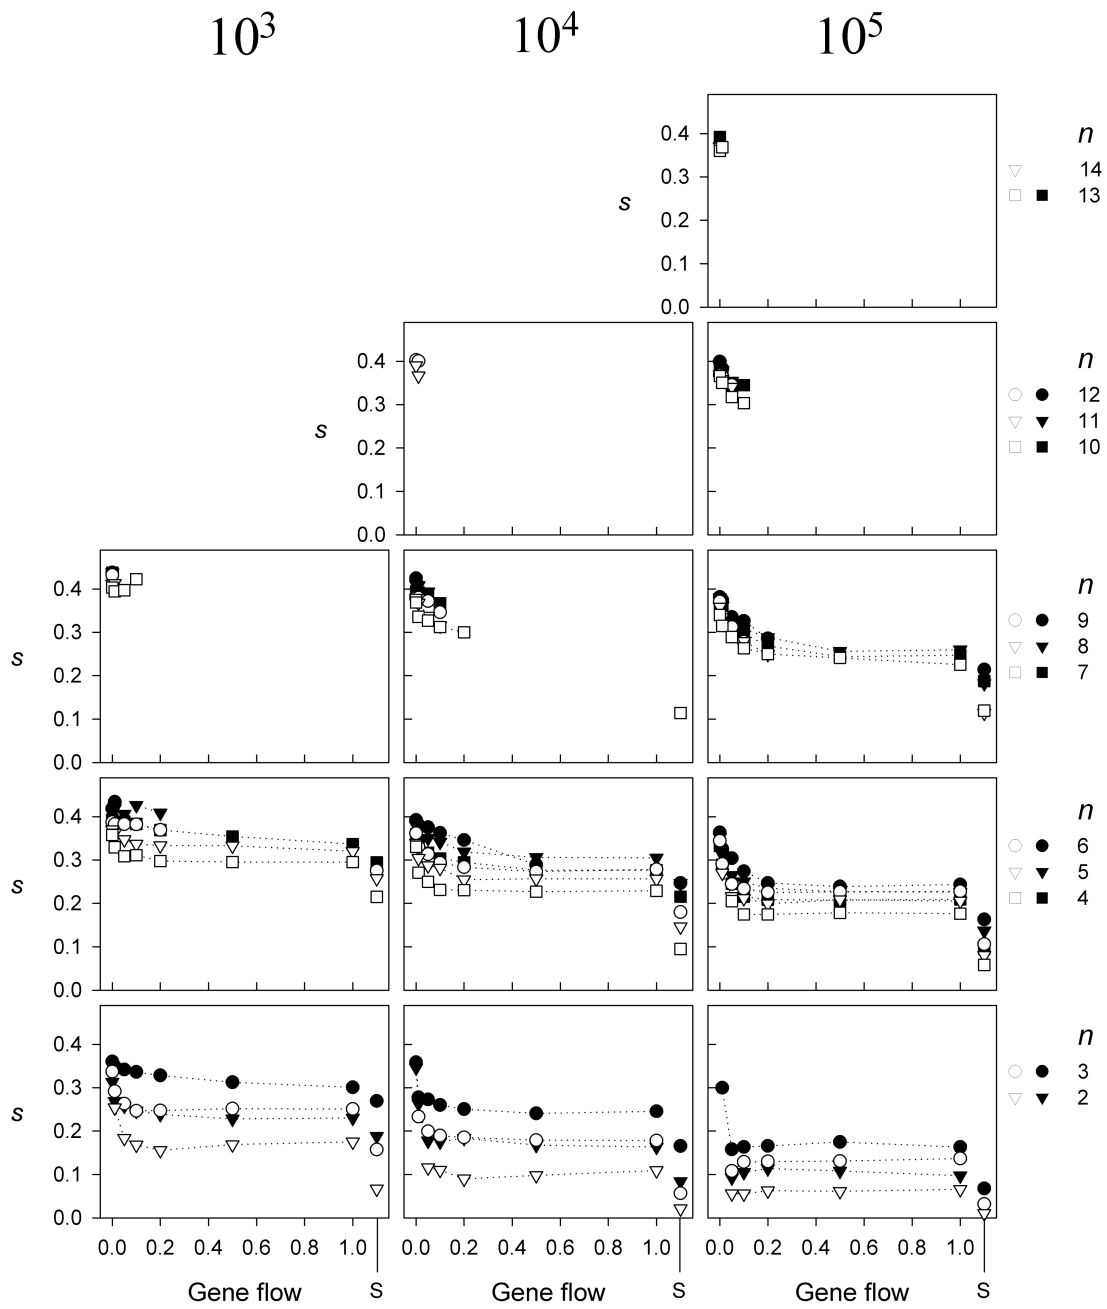

**Figure S2** The level of selection strength ( $s$ ) for genotypes with common alleles (i.e., with frequencies of over 5%) after 10,000 generations as a function of gene flow for three different total population sizes ( $N$ ) and  $n > 1$ . Standard errors are small ( $< 0.03$ ) and omitted for clarity. The black symbols indicate the results for populations with random drift whereas the white symbols indicate those without. The letter S on the x-axis indicates the results for single-deme populations. Only combinations of  $N$ ,  $m$  and  $n$  are shown for which at least 10 replicates were found.
