# Supplementary material
Source: PubMed Central journal article supplement (PMC3632471)
Supplement: 678763c3f98201e4468f6a6a148be776_genetics.113.149781-1.pdf [file 678763c3f98201e4468f6a6a148be776_genetics.113.149781-1.pdf]

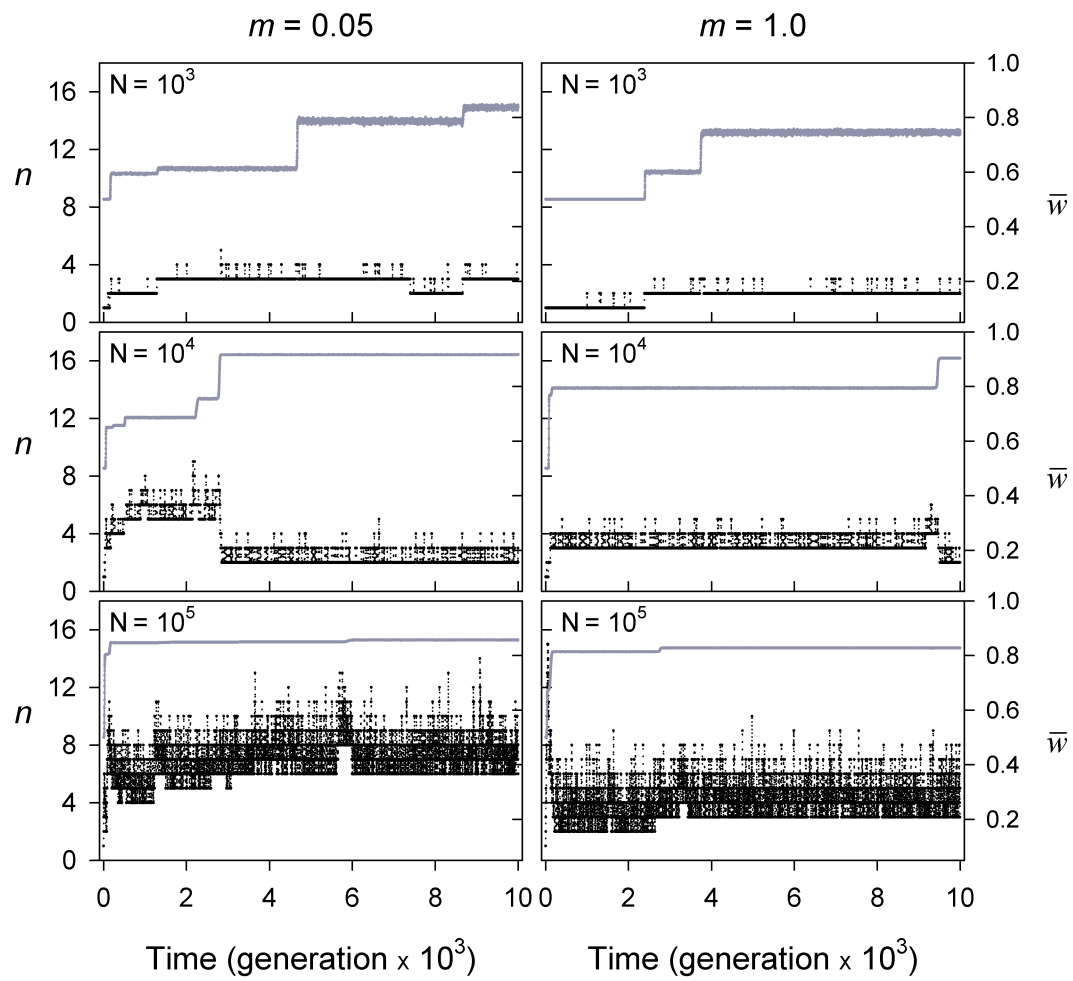

**Figure S1** The number of alleles ( $n$ , left y-axis) and average fitness ( $\bar{w}$ , right y-axis) as a function of time for two levels of gene flow ( $m$ ) and three different population sizes ( $N$ ) for individual simulations. The black, interrupted line indicates  $n$  and the grey continue line indicates  $\bar{w}$ .

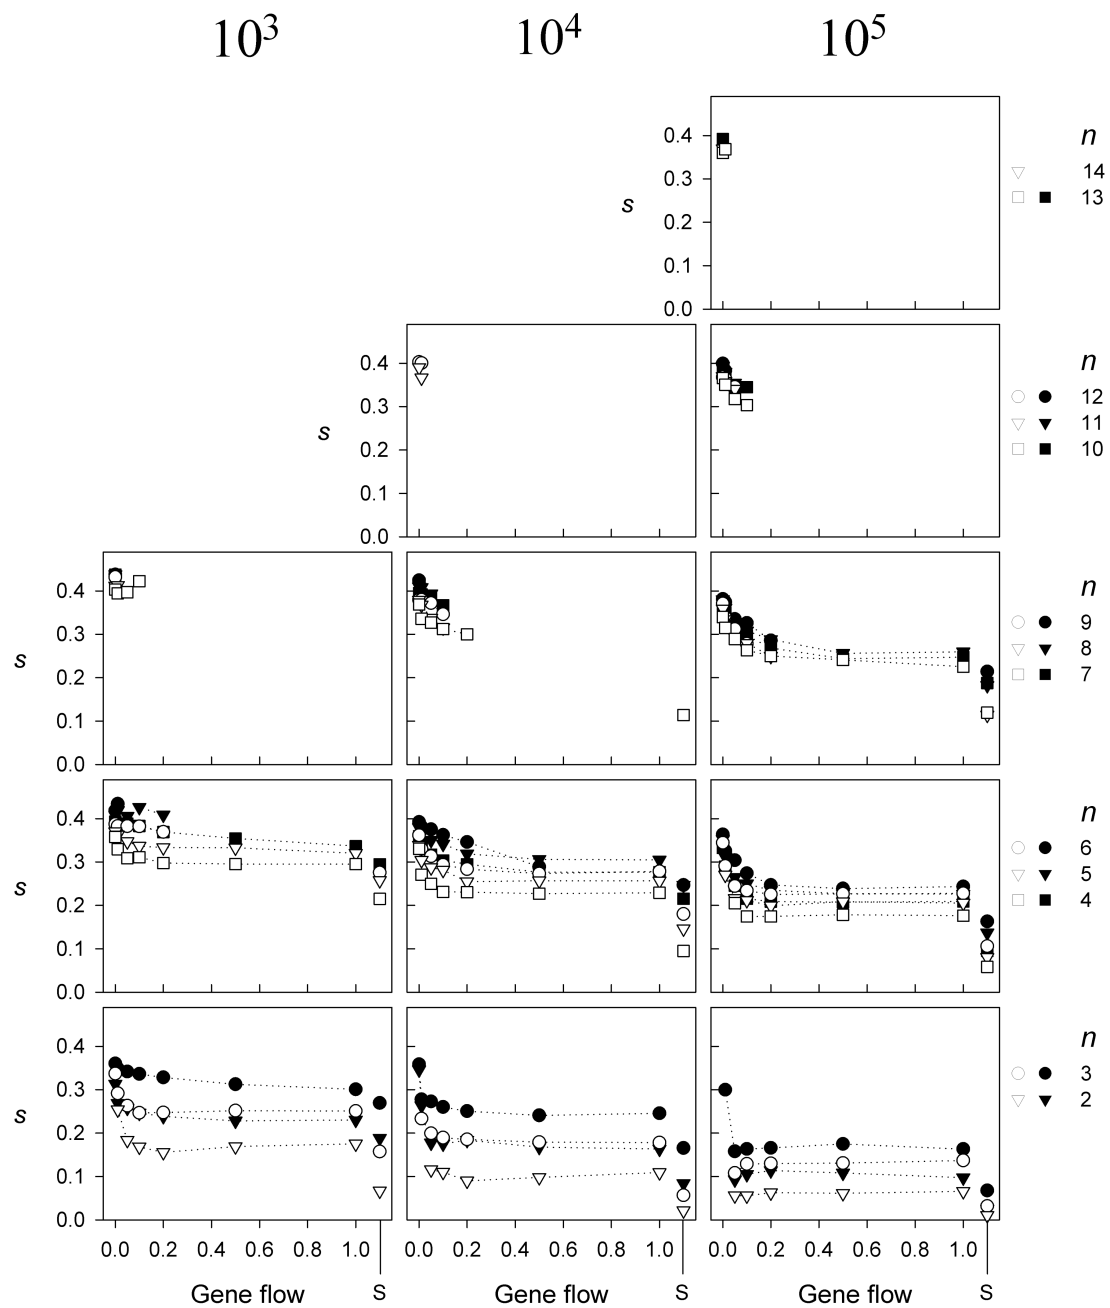

**Figure S2** The level of selection strength ( $s$ ) for genotypes with common alleles (i.e., with frequencies of over 5%) after 10,000 generations as a function of gene flow for three different total population sizes ( $N$ ) and  $n > 1$ . Standard errors are small ( $< 0.03$ ) and omitted for clarity. The black symbols indicate the results for populations with random drift whereas the white symbols indicate those without. The letter S on the x-axis indicates the results for single-deme populations. Only combinations of  $N$ ,  $m$  and  $n$  are shown for which at least 10 replicates were found.

**File S1**

**Spatial Selection Model**

Available for download at [www.genetics.org/lookup/suppl/doi:10.1534/genetics.113.149781/-/DC1](http://www.genetics.org/lookup/suppl/doi:10.1534/genetics.113.149781/-/DC1).
